# Supplementary material for: Organosilica nanoparticle-reinforced resin-based dental composites: synthesis, characterisation, and evaluation of physicochemical properties
Source: Royal Society of Chemistry journal article supplement (doi:10.1039/d6ra01974a), 2026-04-14
Supplement: d6ra01974a1.pdf [file d6ra01974a1.pdf]

## Organosilica nanoparticle-reinforced resin-based dental composites: synthesis, characterisation, and evaluation of physicochemical properties

Mohammed A. Al-Khafaji, <sup>\*a</sup> Ali O. Imarah, <sup>b</sup> Athmar A. Kadhim, <sup>c</sup> Mudher K. Mohammed, <sup>d</sup> Hayder O. Hashim, <sup>e</sup> Judith Mihály <sup>f,g</sup> and Zoltán Varga <sup>f,h</sup>

- a. Department of Basic Science, college of Dentistry, university of Babylon, Hilla, Iraq. Email: phar.mohammed.a.karam@uobabylon.edu.iq, moh\_chem\_84@yahoo.com.
- b. Department of Chemical Engineering, College of Engineering, University of Babylon, Hilla, Iraq.
- c. College of Kufa, Al-Furat Al-Awsat Technical University, Najaf, Iraq.
- d. Department of Pharmacy, Al-Manara College of Medical Science, Amarah, Iraq.
- e. Department of Clinical Laboratory Sciences, College of Pharmacy, University of Babylon, Hilla, Iraq.
- f. Institute of Materials and Environmental Chemistry, HUN-REN Research Centre for Natural Sciences, Budapest, Hungary.
- g. Department of Chemistry, Eszterházy Károly Catholic University, Eger, Hungary.
- h. Department of Physical Chemistry and Materials Science, Faculty of Chemical Technology and Biotechnology, Budapest University of Technology and Economics, Budapest, Hungary.

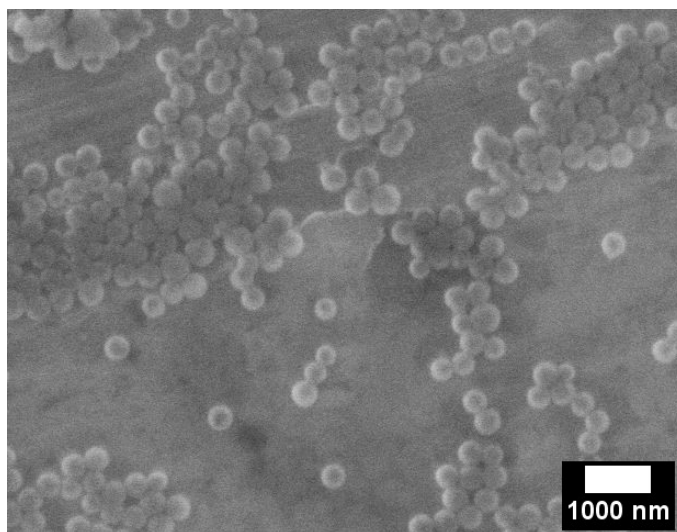

**Figure S1** shows the SEM image of sSiO<sub>2</sub>-MA, indicating a particle size of approximately 259.7 nm with a standard deviation of about 17 nm.

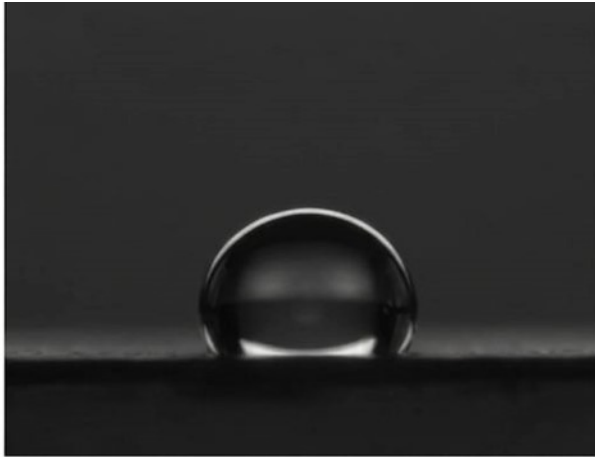

Substrate: csOS  
Fluid: Deionized Water  
Contact Angle:  $112.76^\circ \pm 0.9^\circ$

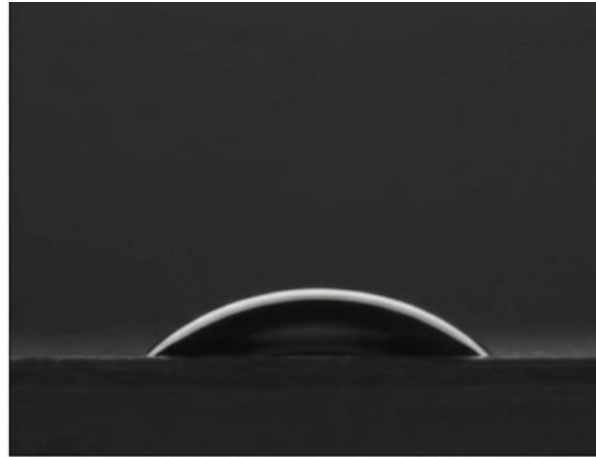

Substrate: sSiO<sub>2</sub>  
Fluid: Deionized Water  
Contact Angle:  $39.16^\circ \pm 1.5^\circ$

**Figure S2** Shows the comparison of water contact angles on csOS and sSiO<sub>2</sub> substrates.

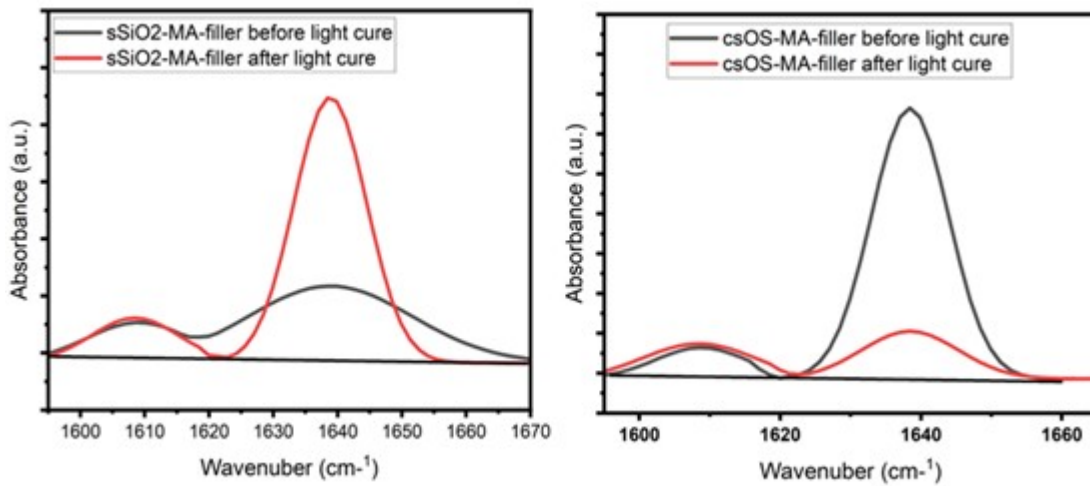

**Figure S3** FTIR spectra showing the absorbance of aliphatic double bonds C=C at  $1640\text{cm}^{-1}$  for sSiO<sub>2</sub>-MA-filler and csOS-MA-filler before and after light curing.
